# Supplementary material for: The impact of adjuvant chemotherapy on overall survival in premenopausal (age≤50 years) hormone and node positive breast cancer patients with an Oncotype Dx score of 25 or less. A NCDB analysis
Source: Research Square preprint supplement (doi:10.21203/rs.3.rs-7201172/v1), 2025-08-06

# **Supplemental Figure 1: Utilization of adjuvant chemotherapy by year of diagnosis**


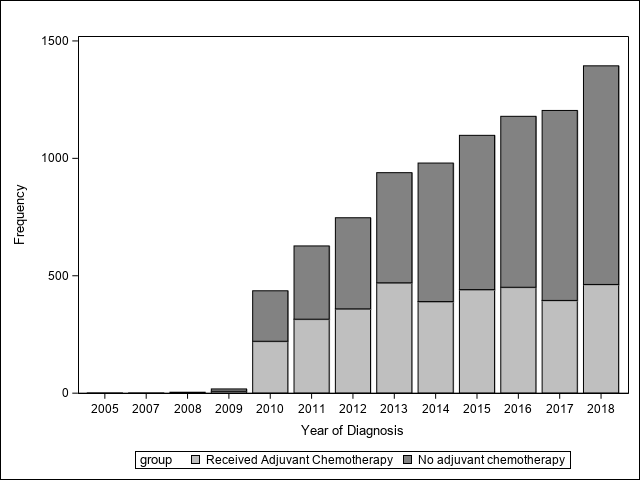


**Supplemental Figure 2. Forest plot of odds ratios (95% CI) from multivariate logistic regression modeling the likelihood of receiving adjuvant chemotherapy.**


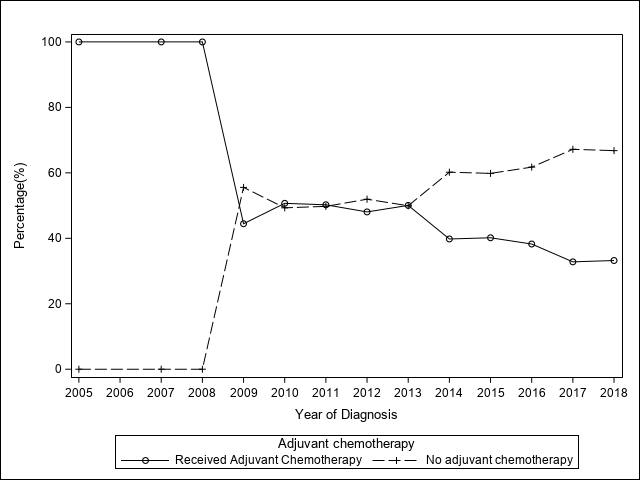


**Supplemental Table 1. Odds ratios (95% CI) from multivariate logistic regression modeling the likelihood of receiving adjuvant chemotherapy.**

| **Effect/Comparison** | **Odds Ratio** | **95% CI** | **p value** |
| --- | --- | --- | --- |
| ANALYTIC_STAGE Stage II vs Stage I | 1.825 | 1.598,2.084 | <.0001 |
| ANALYTIC_STAGE Stage III vs Stage I | 3.199 | 1.593,6.426 | 0.0011 |
| ERPR ER Positive, PR Negative vs ER Positive, PR Positive | 1.647 | 1.108,2.449 | 0.0137 |
| GRADE Moderately differentiated, moderately well differentiated, intermediate differentiation vs Well differentiated | 1.467 | 1.301,1.655 | <.0001 |
| GRADE Poorly differentiated vs Well differentiated, | 2.261 | 1.886,2.711 | <.0001 |
| GRADE Cell type not determined, not stated not applicable, unknown primaries, high grade dysplasia vs Well differentiated | 1.819 | 1.355,2.441 | <.0001 |
| Radiation received vs No Radiation received | 1.758 | 1.544,2.002 | <.0001 |
| Age range in years 40-50 vs 18-40 | 0.684 | 0.542,0.863 | 0.0013 |
| Facility type Academic/Research Program vs Community Cancer Program | 1.111 | 0.984,1.255 | 0.0896 |
| Facility type Integrated Network Cancer Program vs Community Cancer Program | 1.164 | 1.009,1.344 | 0.0376 |
| Facility Unknown vs Community Cancer Program | 1.361 | 1.039,1.783 | 0.0254 |
| Hormonal therapy usage Not used vs Hormonal Therapy was used | 0.667 | 0.524,0.849 | 0.0010 |
| Hormonal therapy usage Unknown vs Hormonal Therapy was used | 1.299 | 0.714,2.364 | 0.3920 |
| Insurance Private Insurance vs Not Insured | 0.832 | 0.593,1.167 | 0.2858 |
| Insurance Government vs Not Insured | 0.725 | 0.505,1.042 | 0.0822 |
| Insurance Unknown vs Not Insured | 0.927 | 0.517,1.662 | 0.7994 |
| OncotypeDx RS 12-25 vs 0-11 | 2.325 | 2.065,2.618 | <.0001 |
| Surgery type Mastectomy vs Partial mastectomy | 1.668 | 1.469,1.894 | <.0001 |
| AJCC Pathologic T stage T2 vs T1 | 0.967 | 0.859,1.088 | 0.5740 |
| AJCC Pathologic T stage T2 T3 vs T1 | 0.832 | 0.425,1.627 | 0.5905 |
| Race African-american vs caucasian | 0.777 | 0.647,0.934 | 0.0072 |
| Race Others vs caucasian | 0.834 | 0.693,1.004 | 0.0554 |
| Area Urban vs Metro | 0.887 | 0.752,1.047 | 0.1576 |
| Lymph node status N2N3 vs N1 | 2.688 | 1.423,5.079 | 0.0023 |

**Supplemental Table 2. Kaplan-Meier survival curves**

| **KM survival for overall cohort** | | | | |
| --- | --- | --- | --- | --- |
|  |  | N (%) | N (%) | P value |
|  | Total | 3056 | 4178 |  |
|  | Censored (%) | 2994(97.97) | 4082(97.70) |  |
| Survival rate% at months (95% CI) | 12 | 100.0(99.8,100.0) | 99.9(99.7,99.9) |  |
| 24 | 99.8(99.6,99.9) | 99.6(99.3,99.8) |  |
| 36 | 99.6(99.3,99.8) | 99.3(99.0,99.5) |  |
| 48 | 99.4(99.0,99.6) | 98.4(97.9,98.8) |  |
| 60 | 98.7(98.1,99.1) | 97.7(97.0,98.2) |  |
| 72 | 97.2(96.2,97.9) | 97.0(96.1,97.6) |  |
| 84 | 96.1(94.8,97.0) | 95.6(94.4,96.6) |  |
| 96 | 95.5(94.0,96.6) | 93.0(90.8,94.7) |  |
| 108 | 93.0(89.8,95.2) | 91.0(87.9,93.4) |  |
| 120 | 93.0(89.8,95.2) | 91.0(87.9,93.4) |  |
| 132 | 93.0(89.8,95.2) | NA |  |
| 144 | 93.0(89.8,95.2) | NA |  |
| Test of equality | Log-Rank |  |  | 0.025 |
| **KM survival for age 18-40 years** | | | | |
|  |  | N (%) | N (%) |  |
|  | Total | 718 | 602 |  |
|  | Censored (%) | 700(97.49) | 581(96.51) |  |
| Survival rate% at months (95% CI) | 12 | 100.0(100.0,100.0) | 100.0(100.0,100.0) |  |
| 24 | 100.0(100.0,100.0) | 99.8(98.8,100.0) |  |
| 36 | 99.7(98.7,99.9) | 99.4(98.0,99.8) |  |
| 48 | 99.3(98.0,99.7) | 98.2(96.3,99.2) |  |
| 60 | 98.4(96.5,99.2) | 96.3(93.4,97.9) |  |
| 72 | 97.1(94.5,98.5) | 95.0(91.4,97.1) |  |
| 84 | 95.0(91.0,97.3) | 92.1(86.6,95.4) |  |
| 96 | 93.3(88.2,96.2) | 89.1(81.7,93.6) |  |
| 108 | 86.0(72.6,93.1) | 82.8(70.0,90.5) |  |
| 120 | 86.0(72.6,93.1) | 82.8(70.0,90.5) |  |
| 132 | 86.0(72.6,93.1) | NA |  |
| 144 | 86.0(72.6,93.1) | NA |  |
| Test of equality | Log-Rank |  |  | 0.070 |
| **KM survival for age 41-50 years** | | | | |
|  |  | N (%) | N (%) |  |
| N | Total | 2338 | 3576 |  |
|  | Censored (%) | 2294(98.12) | 3501(97.90) |  |
| Survival rate% at months (95% CI) * | 12 | 100.0(99.7,100.0) | 99.9(99.7,99.9) |  |
|  | 24 | 99.8(99.5,99.9) | 99.6(99.3,99.7) |  |
|  | 36 | 99.6(99.3,99.8) | 99.3(98.9,99.5) |  |
|  | 48 | 99.4(98.9,99.7) | 98.4(97.9,98.8) |  |
|  | 60 | 98.8(98.1,99.2) | 97.9(97.2,98.4) |  |
|  | 72 | 97.2(96.0,98.0) | 97.3(96.4,97.9) |  |
|  | 84 | 96.3(94.9,97.3) | 96.2(94.9,97.1) |  |
|  | 96 | 96.0(94.5,97.2) | 93.6(91.3,95.3) |  |
|  | 108 | 94.7(91.9,96.5) | 92.2(88.9,94.6) |  |
|  | 120 | 94.7(91.9,96.5) | 92.2(88.9,94.6) |  |
|  | 132 | 94.7(91.9,96.5) | NA |  |
|  | 144 | 94.7(91.9,96.5) | NA |  |
| Test of equality | Log-Rank |  |  | 0.062 |
|  | Wilcoxon |  |  | 0.033 |

**Supplemental Table 3. Hazard ratios (95% CI) comparison between factors from multivariate Cox model**

| **Comparison** | **Hazard Ratio** | **95% CI** | **p value** |
| --- | --- | --- | --- |
| Chemo+ vs Chemo- | 0.560 | 0.399,0.787 | 0.0008 |
| Stage II vs Stage I | 1.227 | 0.771,1.953 | 0.3879 |
| Stage III vs Stage I | 0.770 | 0.146,4.068 | 0.7578 |
| ERPR ER Positive, PR Negative vs ER Positive, PR Positive | 1.518 | 0.615,3.748 | 0.3652 |
| GRADE Moderately differentiated, moderately well differentiated, intermediate differentiation vs Well differentiated | 1.225 | 0.817,1.838 | 0.3265 |
| GRADE Poorly differentiated vs Well differentiated | 2.569 | 1.567,4.212 | 0.0002 |
| GRADE Cell type not determined, not stated not applicable, unknown primaries, high grade dysplasia vs Well differentiated | 1.700 | 0.745,3.877 | 0.2073 |
| Radiation received vs No Radiation received | 0.793 | 0.521,1.205 | 0.2768 |
| Age range 40-50 vs 18-40 years | 0.848 | 0.412,1.745 | 0.6540 |
| Facility Academic/Research Program vs Community Cancer Program | 0.873 | 0.594,1.282 | 0.4871 |
| Facility Integrated Network Cancer Program vs Community Cancer Program | 0.595 | 0.355,0.998 | 0.0492 |
| Facility Unknow vs Community Cancer Program | 1.121 | 0.499,2.516 | 0.7818 |
| Hormonal therapy Not used vs Hormonal Therapy was used | 1.538 | 0.887,2.667 | 0.1251 |
| Hormonal therapy Unknown vs Hormonal Therapy was used | 1.491 | 0.206,10.779 | 0.6923 |
| Insurance Private Insurance vs Not Insured | 0.929 | 0.339,2.542 | 0.8852 |
| Insurance Government vs Not Insured | 2.563 | 0.914,7.188 | 0.0736 |
| Insurance Unknown vs Not Insured | 1.452 | 0.265,7.967 | 0.6675 |
| OncotypeDx RS 12-25 vs 0-11 | 1.549 | 1.031,2.329 | 0.0352 |
| Surgery type Mastectomy vs Partial mastectomy | 0.923 | 0.603,1.412 | 0.7120 |
| AJCC Pathologic T stage T2 vs T1 | 1.466 | 1.016,2.116 | 0.0408 |
| AJCC Pathologic T stage T2 T3 vs T1 | 1.666 | 0.397,6.995 | 0.4857 |
| Race African-american vs caucasian | 1.875 | 1.232,2.852 | 0.0033 |
| Race Others vs caucasian | 0.330 | 0.121,0.899 | 0.0301 |
| Area Urban vs Metro | 1.297 | 0.812,2.072 | 0.2766 |
| Lymph node status N2N3 vs N1 | 3.695 | 0.821,16.623 | 0.0885 |

# **Supplemental Figure 3. Hazard ratios (95% CI) comparison between factors from multivariate Cox model**


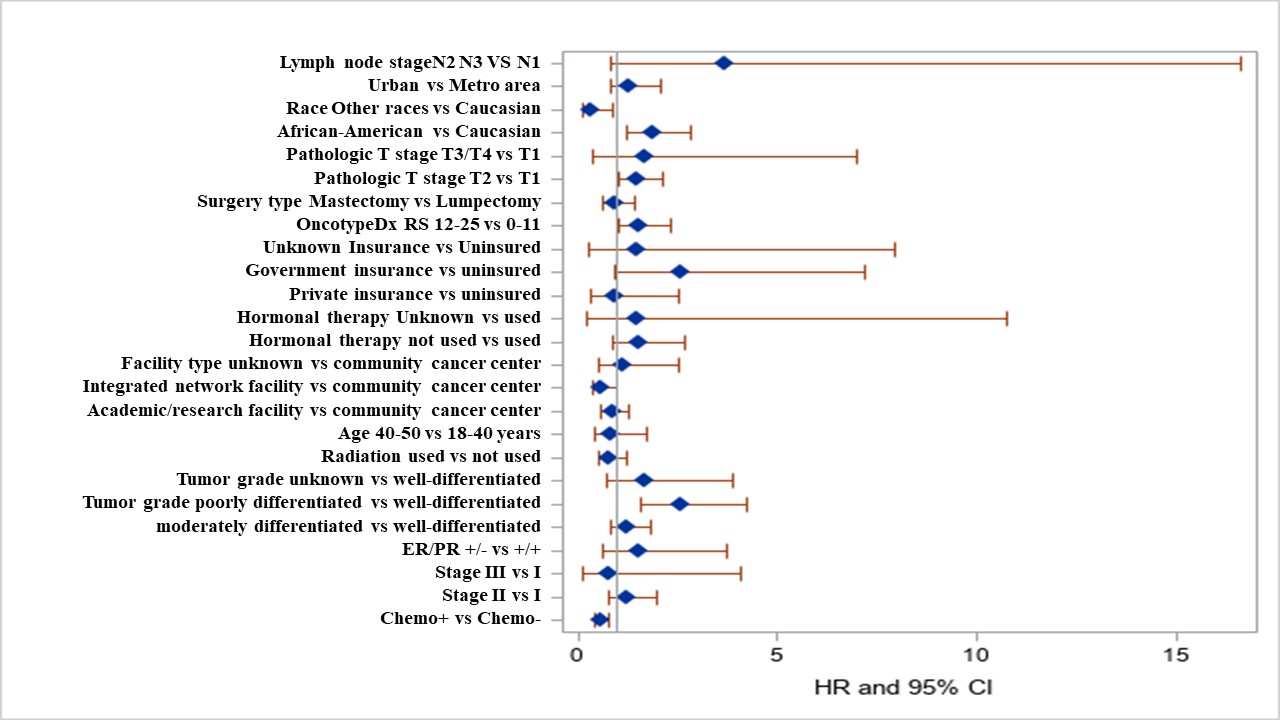

Supplement: Supplementary file 1 [file e2dd8fbfc96f661b9c7f6122.docx]
